# Supplementary material
Source: Elsevier journal article supplement (https://www.sciencedirect.com/science/article/pii/S0213911117302686)
Supplement: mmc2 [file S0213911117302686:mmc2.docx]

**Appendix 2**

**Selected characteristics of the four cases**

|  | La Virgen | El Campo | Mora | Cristina |
| --- | --- | --- | --- | --- |
| Characteristics of area | Large HC in the provincial capital  Middle-low class neighbourhood | Small town in a rural agricultural area | One HC and three associated health posts in a rural area | Large HC in the provincial capital  Middle-high class neighbourhood |
| Total number of social/health staff (GPs, nurses, midwife, paediatrician, social worker) | 35 | 21 | 33 | 32 |
| Total number of PREMIS questionnaires answered | 25 | 18 | 19 | 21 |
| Mean score and SD practice issues | 12.7 (8.2) | 16.4 (9.8) | 8.6 (6.2) | 9.6 (6.9) |
| Total number of interviews conducted | 13 interviewees | 12 interviewees | 9 interviewees | 10 interviewees |

GPs: general practitioners; HC: health centre; SD: standard deviation.
